# Supplementary material for: The discovery of novel LPMO families with a new Hidden Markov model
Source: PubMed Central journal article supplement (PMC5320794; doi:10.1186/s13104-017-2429-8), 2017-02-21

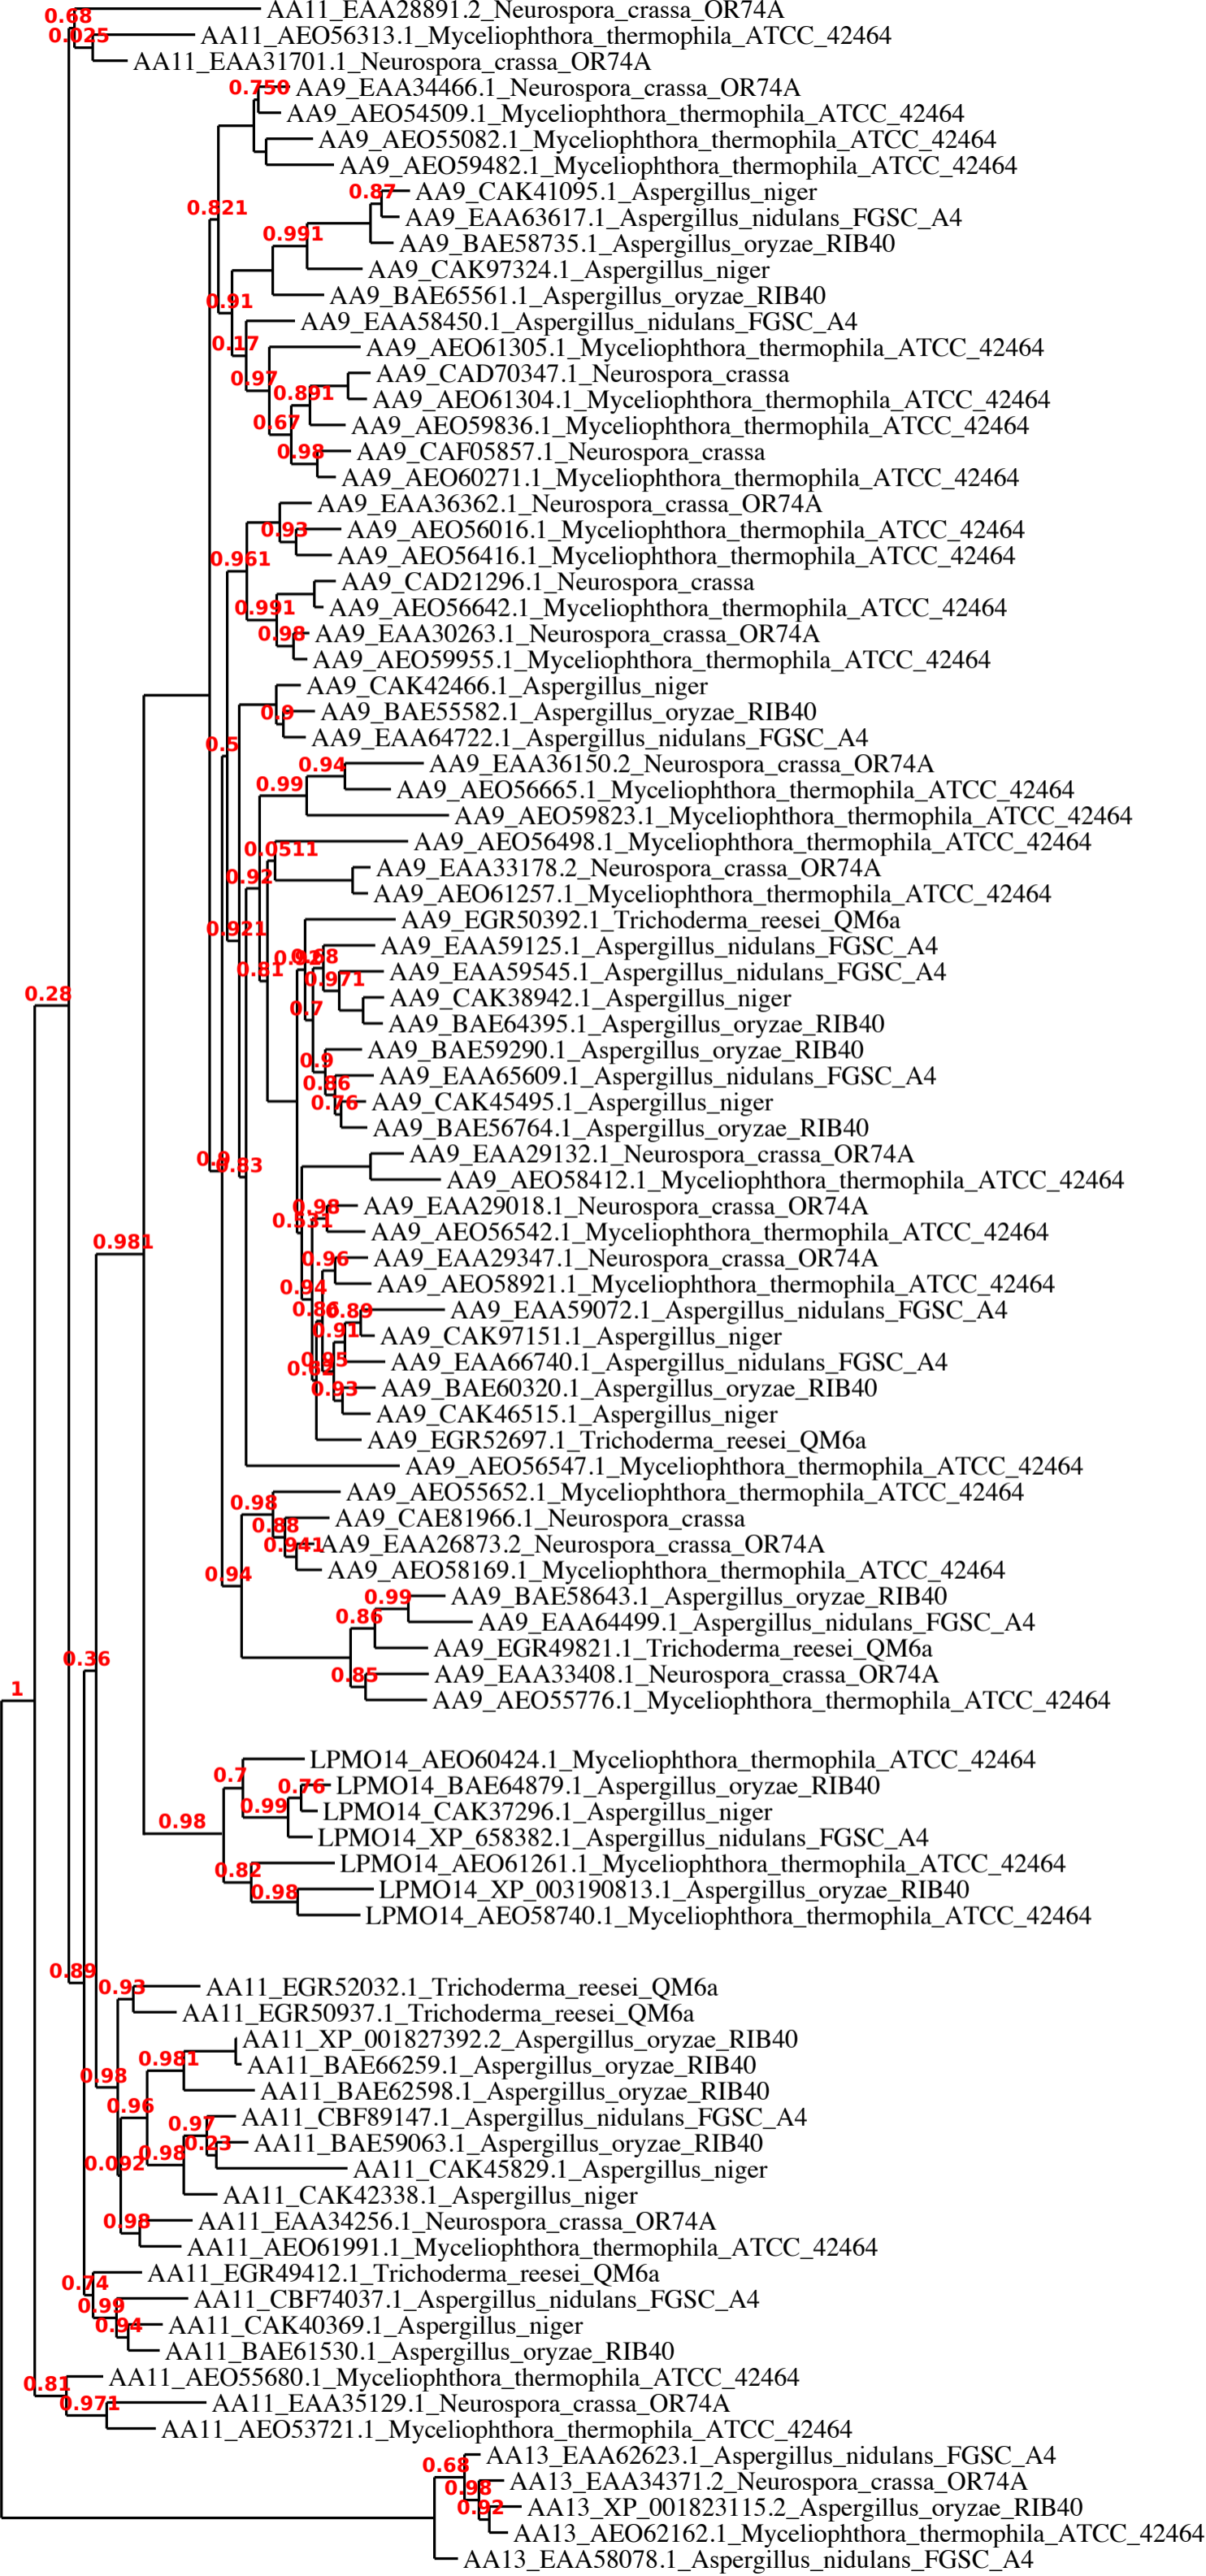

Supplement: 13104_2017_2429_MOESM2_ESM.pdf [file 13104_2017_2429_MOESM2_ESM.pdf]
